# Supplementary material
Source: Springer Nature journal article supplement (https://www.springermedizin.de/resource/supplementary/13058_2010_9529_MOESM6_ESM.pdf/9702366)

**A**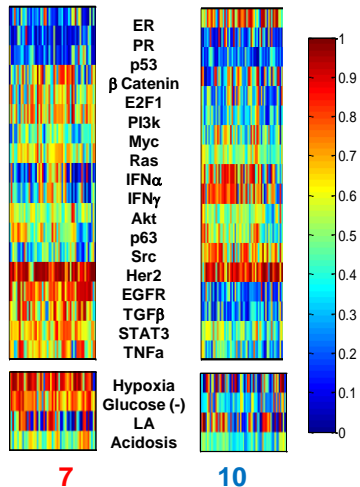**HER2+ RelatedSubgroup****B**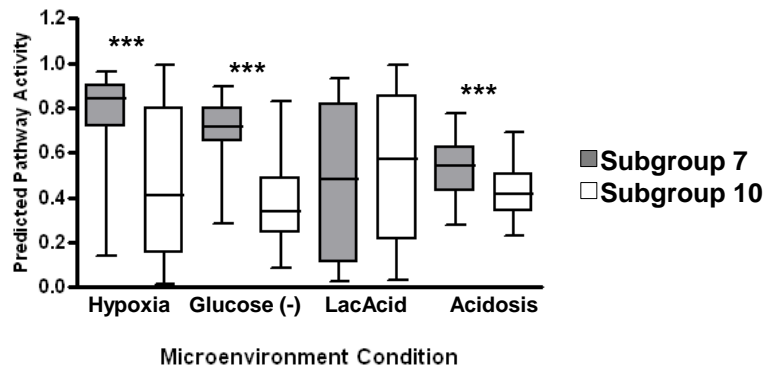**C**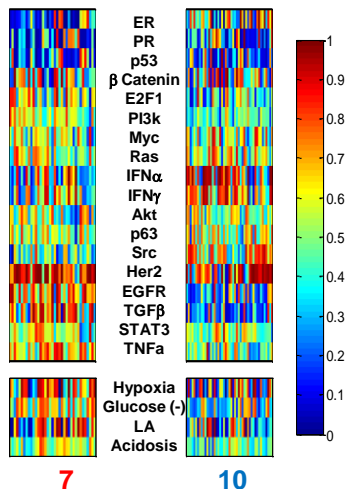**HER2+ RelatedSubgroup****D**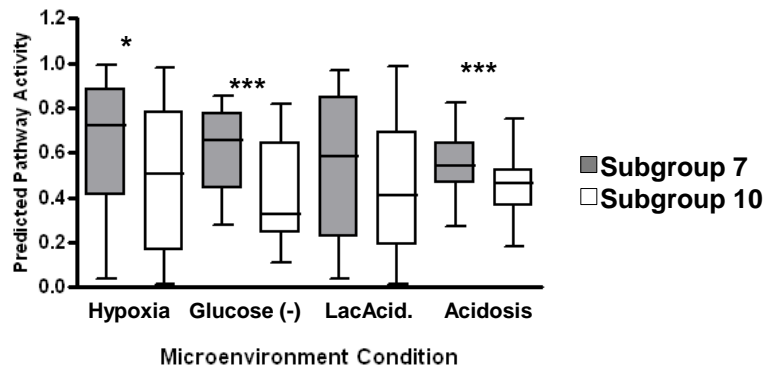

Supplement: MOESM6 [file 9702366]
